# Supplementary material for: The Prop1-like homeobox gene unc-42 specifies the identity of synaptically connected neurons
Source: eLife. 2021 Jun 24;10:e64903. doi: 10.7554/eLife.64903 (PMC8225392; doi:10.7554/eLife.64903)
Supplement: Supplementary file 2. — Clustering outputs of Brittin et al., 2021, Moyle et al., 2021 are shown for each neuron. Discordant clustering results of neuronal subclasses are shown for RMD and SIB. [file elife-64903-supp2.xlsx]

## Sheet: Sheet1
Supplementary File 2: Strata placement of UNC-42+ neurons.
UNC-42+ neuron	Brittin et al 2021 'cluster_id'	Brittin et al 2021 'brainmap_placement'	Moyle et al 20201 'Stratum'
AIB	Taxis	Taxis	Unassigned
ASH	Avoidace	Avoidace	3
AVA	Unclassified	Lateral	Unassigned
AVB	Avoidace	Avoidace	3
AVD	Avoidace	Avoidace	3
AVE	Anterior	Anterior	Unassigned
AVH	Avoidace	Avoidace	3
AVK	Lateral	Lateral	2
RIV	Lateral	Lateral	2
RMDD/V	Anterior	Anterior	1
RMD	Unclassified	Lateral	2
RMF	Lateral	Lateral	2
RMH	Sublateral	Lateral	2
SAA	Lateral	Lateral	2
SIBD	Sublateral	Lateral	2
SIBV	Sublateral	Lateral	Unassigned
SMD	Sublateral	Lateral	2
