# Supplementary material for: The Prop1-like homeobox gene unc-42 specifies the identity of synaptically connected neurons
Source: eLife. 2021 Jun 24;10:e64903. doi: 10.7554/eLife.64903 (PMC8225392; doi:10.7554/eLife.64903)
Supplement: Supplementary file 3. — See Materials and methods for details of this analysis. p-values were calculated using the binomial distribution probability mass function and were adjusted for multiple testing using a false discovery rate correction (see Materials and methods). All genes passing the p<0.05 significance threshold are shown here. Overlap with network differential gene expression analysis shaded in yellow. Red font: genes shown to be involved in neuronal identity regulation (Reilly et al., 2020; Hobert, 2016). [file elife-64903-supp3.xlsx]

## Sheet: all_significant_tfs.csv
Supplementary File 3: Homeobox gene expression correlating with synaptic connectivity
	gene_successes	gene_permutations	p_value	FDR_adjusted_p_value	Percentage	Neurons
unc-42	299	2944	1.56968e-62	8.55477e-61	0.101562	AIB, ASH, AVA, AVB, AVD, AVE, AVH, AVK, RIV, RMD, RMF, RMH, SAA, SIB, SMD
lin-11	247	2404	6.81267e-53	2.47527e-51	0.102745	ADF, ADL, ASG, ASH, AVA, AVD, AVE, AVF, AVG, AVJ, DVA, PVP, PVQ, RIC, RIF, RIM, VC
zag-1	1869	40220	3.55459e-43	9.68625e-42	0.0464694	ADA, AIB, AIM, AIN, AIY, AIZ, ALA, ALM, AS, AVA, AVD, AVE, AVF, AVG, AVH, AVJ, AVK, AVM, AWA, AWC, BDU, DD, DVA, DVB, DVC, HSN, LUA, PDA, PLM, PVC, PVN, PVP, PVQ, PVR, PVT, PVW, RIA, RIB, RIC, RIF, RIG, RIH, RIM, RIP, RIR, RIV, RMD, RME, RMF, RMG, SAB, SDQ, SIA, SIB, SMD, VC, VD
ceh-32	199	1952	1.70273e-42	3.71194e-41	0.101947	ADL, IL1, OLL, RIA, RIB, RID, RMD, RME, RMH, SMD, URY
lim-4	149	1488	1.9081e-31	3.46638e-30	0.100134	AWB, RID, RIV, RMF, RMH, SAA, SIA, SIB, SMB, SMD
dsc-1	27	48	1.58214e-27	2.46362e-26	0.5625	AFD, ASE, AWC
ceh-14	121	1256	1.97569e-24	2.69188e-23	0.0963376	ADA, AFD, AIM, ALA, BDU, DVC, PHA, PHB, PHC, PVC, PVN, PVQ, PVR, PVT, PVW
ceh-23	102	1152	2.64377e-18	2.88171e-17	0.0885417	ADF, ADL, AFD, AIY, ASE, ASG, ASH, AWA, AWC, BAG, CAN, PHA, PHB
egl-5	72	660	4.62703e-18	4.58497e-17	0.109091	AWA, DA, DD, DVB, HSN, LUA, PDA, PDB, PHB, PLM, PVC, VA, VD
ceh-36	27	96	7.856e-18	7.13587e-17	0.28125	ASE, ASI, AWA, AWC
ceh-54	55	448	2.26588e-16	1.89985e-15	0.122768	AFD, ASE, ASG, ASH, AUA, AWA, AWC, BAG
ceh-24	51	400	5.69737e-16	4.43581e-15	0.1275	RME, SAA, SIA, SIB, SMB
ceh-79	46	336	9.92348e-16	7.21106e-15	0.136905	AFD, ASE, ASI, ASJ, AWA, AWC, PHB
ceh-13	229	4260	9.46618e-12	5.7323e-11	0.0537559	AS, DA, DB, DD, RMG, VA, VB, VC, VD
vab-15	15	52	1.00418e-10	5.47278e-10	0.288462	AVG, PVC, PVQ, PVT
mab-5	318	6856	1.53291e-08	7.59487e-08	0.0463827	AS, AVL, DA, DB, DD, PQR, VA, VB, VC, VD
php-3	25	204	2.87817e-08	1.364e-07	0.122549	DVA, DVC, PHC, PLN, PVN, PVR, PVW
nsy-7	1439	37352	7.84771e-08	3.56417e-07	0.0385254	ADF, AFD, AIM, AS, ASH, ASJ, AVA, AVD, AVE, AVG, AVH, AWA, AWC, CAN, CEP, DA, DB, DD, DVA, LUA, OLL, OLQ, PHA, PHB, PQR, PVC, PVP, RIB, RIG, RIH, RIR, RMD, SAB, URY, VA, VB, VC, VD
nob-1	21	164	1.67953e-07	7.32275e-07	0.128049	DVA, PHC, PLN, PVN, PVR, PVW
lim-6	17	136	3.3776e-06	1.26951e-05	0.125	ASE, AVL, DVB, PVT, RIG, RIS, RME
ceh-6	19	184	1.5559e-05	5.65312e-05	0.103261	AUA, AVF, AVH, PDA, RMD
irx-1	35	536	0.000246147	0.00081303	0.0652985	ASG, AVF, AVG, DD, PVQ, PVT, RIH, RIS, SAB
ttx-3	11	96	0.000374496	0.00120059	0.114583	AIA, AIN, AIY, ASK
ceh-16	7	48	0.00102889	0.00311525	0.145833	AIZ, RIF, RIG
ceh-27	12	144	0.00342476	0.0100409	0.0833333	RIM, RIP, RME, RMF
ceh-9	24	376	0.00350051	0.0100409	0.0638298	ADF, ASJ, AWB, PQR, PVN, RIV, SAA
mls-2	6	48	0.00513203	0.0143434	0.125	AIM, ASK, AVJ
ceh-31	14	184	0.00571803	0.0155816	0.076087	AVB, PVR, SDQ, URA, URB
ceh-37	8	96	0.0153039	0.0397173	0.0833333	ASG, AWA, AWB, BAG
also detected by NDGE analysis (Fig.1F)
Evidence for terminal selector function (Hobert, 2016)
